# Supplementary material for: Iron from coal combustion particles dissolves much faster than mineral dust under simulated atmospheric acidic conditions
Source: Copernicus journal article supplement (doi:10.5194/acp-22-6045-2022), 2022-05-09
Supplement: Supplementary file 1 [file acp-22-6045-2022-supplement.pdf]

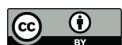

*Supplement of*

**Iron from coal combustion particles dissolves much faster than mineral dust under simulated atmospheric acidic conditions**

**Clarissa Baldo et al.**

*Correspondence to:* Zongbo Shi (z.shi@bham.ac.uk) and Akinori Ito (akinorii@jamstec.go.jp)

The copyright of individual parts of the supplement might differ from the article licence.

### Text S1: Description of the microwave digestion method

“1-3 mg of dust/ash were weighed on quartz filters (1.5 cm<sup>2</sup> punch). The filters were placed into vessels with 10 ml of 68% ultrapure nitric acid (HNO<sub>3</sub>, Romil). The vessels were loaded into a MARS 6 Microwave Digestion System (CEM Technology). The filter-membrane programme was used to digest the samples. This consists of an increase in temperature to 200°C (15-min ramp time) followed by 15 min at 200°C and pressure 800 psi. The sample solutions were then diluted to 2% HNO<sub>3</sub> and filtered through 0.45 µm membrane filters. The samples were stored in the fridge at 4°C prior the analysis. The Fe concentration in the filtrates was measured by inductively coupled plasma mass spectrometry (ICP-MS) analysis.

After each digestion, the vessels were cleaned to prevent contamination. These were first washed with DI water and dried in the oven at 70°C. Subsequently, 10 ml of concentrated HNO<sub>3</sub> was added to each vessel which were placed into the microwave to undergo the cleaning programme (ramp time of 15 min to 190°C, followed by 10 min at 190°C and pressure 800 psi). Finally, the vessels were rinsed with DI water and air-dried in a fume hood. All glassware was acid washed in 10% HNO<sub>3</sub>.

To assess the recovery of Fe, we used a standard reference material for urban particulate matter (1 mg of NIST SRM 1648A on quartz filter). The recovery of Fe from NIST was 89.0% ± 0.4%. We used the Arizona Test Dust (ATD, Iso 12103-1, Power Technology, Inc.) to test the method. The estimated total Fe content in the ATD was 3.501% ± 0.056% which is comparable with the latest consensus value for the total Fe in ATD. Here, the estimated recovery of Fe from the ATD samples calculated using the reference total Fe in ATD and the total Fe in the ATD samples obtained in this study (prior the correction for the Fe recovery based on the NIST results) is 94.0% ± 1.5%”.

25 **Table S1: Summary of the Fe dissolution experiments conducted in this study. A particles/liquid ratio of 1 g L<sup>-1</sup> was used at different experimental conditions. The molar concentrations of H<sub>2</sub>SO<sub>4</sub>, H<sub>2</sub>C<sub>2</sub>O<sub>4</sub> and (NH<sub>4</sub>)<sub>2</sub>SO<sub>4</sub> in the experiment solutions are reported (mol L<sup>-1</sup>). The molar concentration and activity (a) of H<sup>+</sup> and the solution pH before adding the samples (i) and at the end of the experiments (f) were calculated using the E-AIM model III for aqueous solution (Wexler and Clegg, 2002). The estimated buffered H<sup>+</sup> is ~0.008 M for Krakow ash, ~0.0007 M for Aberthaw/Shandong ash, ~0.004 M for Libyan dust end member (the procedure used to calculate the sample buffer capacity is reported in section 2.2). The final pH (pH<sub>f</sub>) accounts for the buffer capacity of the CFA samples. For the experiment solutions with no (NH<sub>4</sub>)<sub>2</sub>SO<sub>4</sub>, the initial pH (pH<sub>i</sub>) and pH<sub>f</sub> were also measured**

30

|              | Exp.  | [H <sub>2</sub> SO <sub>4</sub> ] | [(NH <sub>4</sub> ) <sub>2</sub> SO <sub>4</sub> ] | [H <sub>2</sub> C <sub>2</sub> O <sub>4</sub> ] | Model estimates                |                                |                                 |                                 |                 |                 | Measured pH     |                 |
|--------------|-------|-----------------------------------|----------------------------------------------------|-------------------------------------------------|--------------------------------|--------------------------------|---------------------------------|---------------------------------|-----------------|-----------------|-----------------|-----------------|
|              |       |                                   |                                                    |                                                 | [H <sup>+</sup> ] <sub>i</sub> | [H <sup>+</sup> ] <sub>f</sub> | a(H <sup>+</sup> ) <sub>i</sub> | a(H <sup>+</sup> ) <sub>f</sub> | pH <sub>i</sub> | pH <sub>f</sub> | pH <sub>i</sub> | pH <sub>f</sub> |
| Krakow ash   | Exp 1 | 0.01                              | -                                                  | -                                               | 0.016                          | 0.009                          | 0.86                            | 0.86                            | 1.9             | 2.1             | 1.9             | 2.1             |
|              | Exp 2 | 0.05                              | 1                                                  | -                                               | 0.031                          | 0.029                          | 0.29                            | 0.29                            | 2.0             | 2.1             | 0.0             | -               |
|              | Exp 3 | 0.05                              | 1                                                  | 0.01                                            | 0.035                          | 0.032                          | 0.29                            | 0.29                            | 2.0             | 2.0             | 0.0             | -               |
|              | Exp 4 | 0.01                              | -                                                  | 0.01                                            | 0.023                          | 0.016                          | 0.86                            | 0.85                            | 1.7             | 1.9             | 1.7             | 1.9             |
|              | Exp 1 | 0.005                             | -                                                  | -                                               | 0.008                          | 0.002                          | 0.89                            | 0.88                            | 2.1             | 2.7             | 2.2             | 2.6             |
|              | Exp 2 | 0.01                              | 1                                                  | -                                               | 0.006                          | 0.004                          | 0.28                            | 0.28                            | 2.8             | 3.0             | 0.0             | -               |
|              | Exp 3 | 0.005                             | 1                                                  | 0.01                                            | 0.007                          | 0.005                          | 0.28                            | 0.28                            | 2.7             | 2.9             | 0.0             | -               |
|              | Exp 5 | 0.1                               | -                                                  | 0.03                                            | 0.138                          | 0.131                          | 0.76                            | 0.76                            | 1.0             | 1.0             | 1.1             | 1.1             |
|              | Exp 6 | 0.25                              | 0.5                                                | 0.03                                            | 0.189                          | 0.186                          | 0.49                            | 0.49                            | 1.0             | 1.0             | 0.0             | -               |
|              | Exp 7 | 0.35                              | 1                                                  | 0.03                                            | 0.252                          | 0.249                          | 0.39                            | 0.39                            | 1.0             | 1.0             | 0.0             | -               |
|              | Exp 8 | 0.4                               | 1.5                                                | 0.03                                            | 0.285                          | 0.282                          | 0.33                            | 0.33                            | 1.0             | 1.0             | 0.0             | -               |
| Aberthaw ash | Exp 1 | 0.005                             | -                                                  | -                                               | 0.008                          | 0.008                          | 0.89                            | 0.89                            | 2.1             | 2.2             | 2.1             | 2.3             |
|              | Exp 2 | 0.05                              | 1                                                  | -                                               | 0.031                          | 0.031                          | 0.29                            | 0.29                            | 2.0             | 2.0             | 0.0             | -               |
|              | Exp 3 | 0.05                              | 1                                                  | 0.01                                            | 0.035                          | 0.034                          | 0.29                            | 0.29                            | 2.0             | 2.0             | 0.0             | -               |
|              | Exp 4 | 0.002                             | -                                                  | 0.01                                            | 0.012                          | 0.011                          | 0.90                            | 0.90                            | 2.0             | 2.0             | 2.0             | 2.1             |
|              | Exp 1 | 0.001                             | -                                                  | -                                               | 0.002                          | 0.001                          | 0.94                            | 0.94                            | 2.8             | 2.9             | 2.8             | 3.1             |
|              | Exp 2 | 0.005                             | 1                                                  | -                                               | 0.003                          | 0.003                          | 0.28                            | 0.28                            | 3.1             | 3.1             | 0.0             | -               |
| Shandong ash | Exp 1 | 0.005                             | -                                                  | -                                               | 0.008                          | 0.008                          | 0.89                            | 0.89                            | 2.1             | 2.2             | 2.1             | 2.2             |
|              | Exp 2 | 0.05                              | 1                                                  | -                                               | 0.031                          | 0.031                          | 0.29                            | 0.29                            | 2.0             | 2.0             | 0.0             | -               |
|              | Exp 3 | 0.05                              | 1                                                  | 0.01                                            | 0.035                          | 0.034                          | 0.29                            | 0.29                            | 2.0             | 2.0             | 0.0             | -               |
|              | Exp 4 | 0.002                             | -                                                  | 0.01                                            | 0.012                          | 0.011                          | 0.90                            | 0.90                            | 2.0             | 2.0             | 2.0             | 2.0             |
|              | Exp 1 | 0.001                             | -                                                  | -                                               | 0.002                          | 0.001                          | 0.94                            | 0.94                            | 2.8             | 2.9             | 2.8             | 3.1             |
|              | Exp 2 | 0.005                             | 1                                                  | -                                               | 0.003                          | 0.003                          | 0.28                            | 0.28                            | 3.1             | 3.1             | 0.0             | -               |
| Libyan dust  | Exp 1 | 0.01                              | -                                                  | -                                               | 0.016                          | 0.012                          | 0.86                            | 0.86                            | 1.9             | 2.0             | 1.9             | 2.0             |
|              | Exp 2 | 0.05                              | 1                                                  | -                                               | 0.031                          | 0.030                          | 0.29                            | 0.29                            | 2.0             | 2.1             | 0.0             | -               |
|              | Exp 3 | 0.05                              | 1                                                  | 0.01                                            | 0.035                          | 0.033                          | 0.29                            | 0.29                            | 2.0             | 2.0             | 0.0             | -               |
|              | Exp 4 | 0.005                             | -                                                  | 0.01                                            | 0.016                          | 0.012                          | 0.88                            | 0.87                            | 1.9             | 2.0             | 1.9             | 2.0             |

**Table S2: Percentages of ascorbate Fe (FeA), dithionite Fe (FeD), magnetite Fe (FeM), and total Fe (FeT) in the Arizona Test Dust (ATD, Iso 12103-1, Power Technology, Inc.) to the total dust mass (wt%). For each type of extracted Fe, the standard deviation (SD), relative standard deviations (RSD), and number of replicates (n) is reported.**

| Fe species | wt%   | SD    | RSD (%) | n |
|------------|-------|-------|---------|---|
| FeA        | 0.057 | 0.002 | 3       | 7 |
| FeD        | 0.394 | 0.045 | 11      | 7 |
| FeM        | 0.047 | 0.006 | 12      | 7 |
| FeT        | 3.501 | 0.056 | 2       | 3 |

**Table S3: Summary of the molar concentration in mol L<sup>-1</sup> and activity (a) of total oxalate ions, C<sub>2</sub>O<sub>4</sub><sup>2-</sup>, and HC<sub>2</sub>O<sub>4</sub><sup>-</sup> in the experiment solutions calculated using the E-AIM model III for aqueous solution (Wexler and Clegg, 2002). A comprehensive description of the experimental conditions is provided in Table S1. pH<sub>f</sub> is the calculated final pH in the experiment solutions.**

| Sample       | Exp.  | pH <sub>f</sub> | [oxalate] <sub>total</sub> | [C <sub>2</sub> O <sub>4</sub> <sup>2-</sup> ] | a(C <sub>2</sub> O <sub>4</sub> <sup>2-</sup> ) | [HC <sub>2</sub> O <sub>4</sub> <sup>-</sup> ] | a(HC <sub>2</sub> O <sub>4</sub> <sup>-</sup> ) |
|--------------|-------|-----------------|----------------------------|------------------------------------------------|-------------------------------------------------|------------------------------------------------|-------------------------------------------------|
| Krakow ash   | Exp 3 | 2.0             | 0.009                      | 0.00071                                        | 0.04                                            | 0.009                                          | 0.55                                            |
| Krakow ash   | Exp 4 | 1.9             | 0.008                      | 0.00006                                        | 0.49                                            | 0.008                                          | 0.86                                            |
| Krakow ash   | Exp 3 | 2.9             | 0.010                      | 0.00343                                        | 0.04                                            | 0.006                                          | 0.54                                            |
| Krakow ash   | Exp 5 | 1.0             | 0.012                      | 0.00002                                        | 0.22                                            | 0.012                                          | 0.79                                            |
| Krakow ash   | Exp 6 | 1.0             | 0.015                      | 0.00010                                        | 0.06                                            | 0.015                                          | 0.64                                            |
| Krakow ash   | Exp 7 | 1.0             | 0.015                      | 0.00015                                        | 0.04                                            | 0.015                                          | 0.65                                            |
| Krakow ash   | Exp 8 | 1.0             | 0.015                      | 0.00022                                        | 0.03                                            | 0.015                                          | 0.68                                            |
| Aberthaw ash | Exp 3 | 2.0             | 0.009                      | 0.00066                                        | 0.04                                            | 0.009                                          | 0.56                                            |
| Aberthaw ash | Exp 4 | 2.0             | 0.009                      | 0.00007                                        | 0.60                                            | 0.009                                          | 0.90                                            |
| Shandong ash | Exp 3 | 2.0             | 0.009                      | 0.00066                                        | 0.04                                            | 0.009                                          | 0.56                                            |
| Shandong ash | Exp 4 | 2.0             | 0.009                      | 0.00007                                        | 0.60                                            | 0.009                                          | 0.90                                            |
| Libyan dust  | Exp 3 | 2.0             | 0.009                      | 0.00068                                        | 0.04                                            | 0.009                                          | 0.56                                            |
| Libyan dust  | Exp 4 | 2.0             | 0.008                      | 0.00006                                        | 0.55                                            | 0.008                                          | 0.88                                            |

**Table S4: Modelled mass concentration of total Fe in PM<sub>2.5</sub> aerosol particles (ng m<sup>-3</sup>) over the Bay of Bengal from 27 December 2008 to 26 January 2009. Observations are reported in Bikkina et al. (2020). The concentrations of total Fe were calculated along the cruise tracks in the North Bay of Bengal (27 December 2008 - 10 January 2009) and the South Bay of Bengal (11-26 January 2009) using the IMPACT model. The total Fe emissions from anthropogenic combustion sources (ANTHRO) and biomass burning (BB) were estimated using the emission inventory of (Ito et al., 2018), whereas Fe emissions from mineral dust sources (DUST) were dynamically simulated (Ito et al., 2021).**

| Date       | DUST | ANTHRO | BB  | Total Fe |
|------------|------|--------|-----|----------|
| 27/12/2008 | 20.7 | 11.1   | 0.2 | 31.9     |
| 28/12/2008 | 56.8 | 12.8   | 0.4 | 70.0     |
| 29/12/2008 | 71.2 | 10.7   | 0.4 | 82.4     |
| 30/12/2008 | 48.5 | 11.7   | 0.5 | 60.7     |
| 31/12/2008 | 55.3 | 17.1   | 0.6 | 73.0     |
| 01/01/2009 | 65.4 | 25.2   | 0.7 | 91.3     |
| 02/01/2009 | 69.2 | 33.5   | 0.7 | 103.4    |
| 03/01/2009 | 66.8 | 33.4   | 0.6 | 100.8    |
| 04/01/2009 | 48.0 | 19.1   | 0.5 | 67.7     |
| 05/01/2009 | 18.1 | 9.2    | 0.4 | 27.8     |
| 06/01/2009 | 6.5  | 7.0    | 0.3 | 13.9     |
| 07/01/2009 | 36.3 | 18.9   | 0.4 | 55.6     |
| 08/01/2009 | 31.1 | 14.9   | 0.4 | 46.4     |
| 09/01/2009 | 13.9 | 6.4    | 0.5 | 20.8     |
| 10/01/2009 | 3.4  | 27.9   | 1.9 | 33.2     |
| 11/01/2009 | 7.2  | 35.2   | 3.8 | 46.3     |
| 12/01/2009 | 5.6  | 21.4   | 3.5 | 30.5     |
| 13/01/2009 | 3.3  | 13.6   | 5.4 | 22.3     |
| 14/01/2009 | 3.3  | 15.0   | 7.0 | 25.2     |
| 15/01/2009 | 4.2  | 25.7   | 4.9 | 34.8     |
| 16/01/2009 | 4.6  | 24.3   | 6.1 | 35.0     |
| 17/01/2009 | 2.9  | 15.5   | 6.4 | 24.8     |
| 18/01/2009 | 2.0  | 9.5    | 4.7 | 16.1     |
| 19/01/2009 | 1.1  | 3.4    | 2.2 | 6.7      |
| 20/01/2009 | 1.0  | 4.3    | 3.9 | 9.2      |
| 21/01/2009 | 2.3  | 9.4    | 2.7 | 14.3     |
| 22/01/2009 | 2.5  | 8.7    | 2.1 | 13.2     |
| 23/01/2009 | 1.1  | 4.2    | 4.3 | 9.6      |
| 24/01/2009 | 0.7  | 2.4    | 5.0 | 8.1      |
| 25/01/2009 | 0.6  | 2.9    | 9.5 | 13.1     |
| 26/01/2009 | 0.4  | 2.5    | 8.2 | 11.2     |

50 Table S5: Modelled Fe solubility in PM<sub>2.5</sub> aerosol particles (Fe%) over the Bay of Bengal from 27 December 2008 to 26 January 2009. Observations are reported in Bikkina et al. (2020). The aerosol Fe solubility were calculated along the cruise tracks in the North Bay of Bengal (27 December 2008 - 10 January 2009) and the South Bay of Bengal (11-26 January 2009) using the IMPACT model. In Test 0, we run the model without upgrades (Ito et al., 2021) and applying the proton-promoted, oxalate-promoted, and photoinduced dissolution schemes for combustion aerosols in Table S6 (Ito, 2015). The proton + oxalate dissolution scheme (Table 1) was applied in Test 1 and 3, while proton-promoted dissolution is used for Test 2. We adopted the base mineralogy for anthropogenic Fe emissions (Rathod et al., 2020) in Test 1 and 2. In Test 3, the Fe speciation of Krakow ash was used for all combustion sources.

| Date       | Test 0 | Test 1 | Test 2 | Test 3 |
|------------|--------|--------|--------|--------|
| 27/12/2008 | 14.2   | 17.2   | 38.0   | 15.2   |
| 28/12/2008 | 8.8    | 11.1   | 21.7   | 10.6   |
| 29/12/2008 | 6.5    | 9.3    | 17.2   | 9.2    |
| 30/12/2008 | 7.5    | 12.5   | 25.1   | 13.2   |
| 31/12/2008 | 7.5    | 14.4   | 29.9   | 14.6   |
| 01/01/2009 | 8.7    | 16.2   | 33.2   | 16.3   |
| 02/01/2009 | 8.8    | 15.8   | 34.1   | 16.0   |
| 03/01/2009 | 8.8    | 16.5   | 37.9   | 16.0   |
| 04/01/2009 | 8.9    | 16.1   | 35.7   | 16.0   |
| 05/01/2009 | 14.0   | 18.2   | 40.4   | 19.2   |
| 06/01/2009 | 21.6   | 25.2   | 58.4   | 26.6   |
| 07/01/2009 | 12.1   | 17.7   | 39.6   | 17.2   |
| 08/01/2009 | 9.5    | 16.4   | 36.0   | 15.6   |
| 09/01/2009 | 10.5   | 15.9   | 33.4   | 16.3   |
| 10/01/2009 | 19.0   | 26.7   | 77.9   | 31.4   |
| 11/01/2009 | 12.8   | 24.2   | 74.2   | 29.3   |
| 12/01/2009 | 16.3   | 24.7   | 81.1   | 30.0   |
| 13/01/2009 | 25.2   | 24.0   | 82.8   | 30.9   |
| 14/01/2009 | 20.5   | 23.8   | 86.8   | 31.1   |
| 15/01/2009 | 12.8   | 24.4   | 89.8   | 30.0   |
| 16/01/2009 | 15.0   | 24.4   | 88.6   | 30.4   |
| 17/01/2009 | 22.8   | 26.3   | 90.7   | 33.2   |
| 18/01/2009 | 32.0   | 28.2   | 91.2   | 35.3   |
| 19/01/2009 | 47.9   | 28.8   | 88.7   | 35.3   |
| 20/01/2009 | 48.7   | 30.7   | 94.5   | 39.9   |
| 21/01/2009 | 36.5   | 35.7   | 88.6   | 42.0   |
| 22/01/2009 | 37.1   | 37.8   | 86.7   | 41.7   |
| 23/01/2009 | 60.9   | 37.5   | 95.3   | 46.8   |
| 24/01/2009 | 73.0   | 35.7   | 97.6   | 47.3   |
| 25/01/2009 | 66.8   | 32.7   | 98.8   | 46.0   |
| 26/01/2009 | 71.6   | 34.7   | 99.2   | 47.7   |

**Table S6: Constants used to calculate the Fe dissolution rates for fossil fuel combustion aerosols in Ito (2015), and the new dissolution scheme implemented in this study. Note that the dissolution scheme in Ito (2015) was based on laboratory measurements conducted at low ionic strength.**

| Scheme           | Reference  | Rate constant - $k(\text{pH}, T)^a$                             |                                 | $m^c$ |
|------------------|------------|-----------------------------------------------------------------|---------------------------------|-------|
| Proton           | Ito (2015) | $5.24 \times 10^{-8} \exp[E(\text{pH})^b \times (1/298 - 1/T)]$ |                                 | 0.36  |
| Oxalate          | Ito (2015) | $3.85 \times 10^{-6} \exp[E(\text{pH})^b \times (1/298 - 1/T)]$ |                                 | 1     |
| Photoinduced     | Ito (2015) | $4.10 \times 10^{-6} \exp[E(\text{pH})^b \times (1/298 - 1/T)]$ |                                 | 1     |
| Proton           | This study | $7.61 \times 10^{-6} \exp[E(\text{pH})^b \times (1/298 - 1/T)]$ | Stage I - Kinetic fast          | 0.241 |
|                  |            | $1.91 \times 10^{-7} \exp[E(\text{pH})^b \times (1/298 - 1/T)]$ | Stage II - Kinetic intermediate | 0.195 |
|                  |            | $2.48 \times 10^{-7} \exp[E(\text{pH})^b \times (1/298 - 1/T)]$ | Stage III - Kinetic slow        | 0.843 |
| Proton + Oxalate | This study | $5.54 \times 10^{-6} \exp[E(\text{pH})^b \times (1/298 - 1/T)]$ | Stage I - Kinetic fast          | 0.209 |
|                  |            | $1.50 \times 10^{-7} \exp[E(\text{pH})^b \times (1/298 - 1/T)]$ | Stage II - Kinetic intermediate | 0.091 |
|                  |            | $1.77 \times 10^{-8} \exp[E(\text{pH})^b \times (1/298 - 1/T)]$ | Stage III - Kinetic slow        | 0.204 |

60 <sup>a</sup> $K(\text{pH}, T)$  is the rate constant ( $\text{moles Fe g}^{-1} \text{s}^{-1}$ ) for each dissolution scheme.

<sup>b</sup> $E(\text{pH}) = -1.56 \times 10^3 \times \text{pH} + 1.08 \times 10^4$ .

<sup>c</sup> $m_i$  is the reaction order with respect to aqueous phase protons.

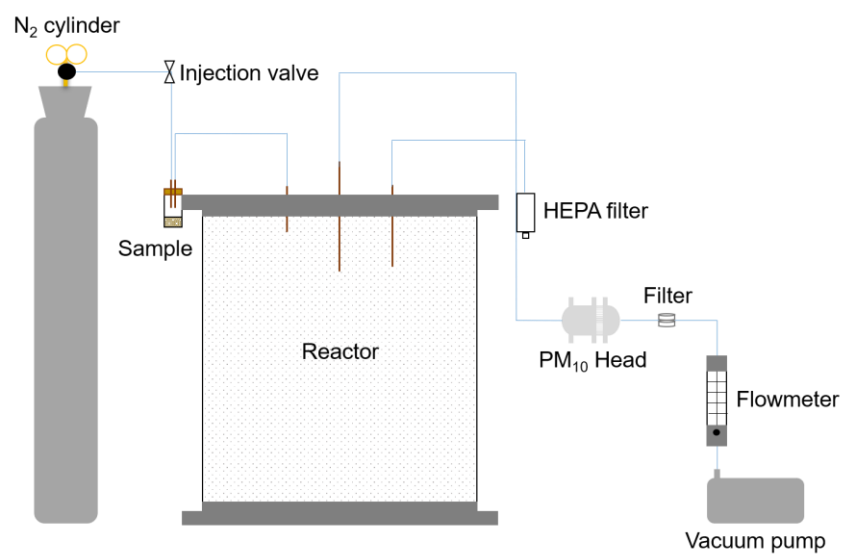

**Figure S1: PM<sub>10</sub> collection system.**

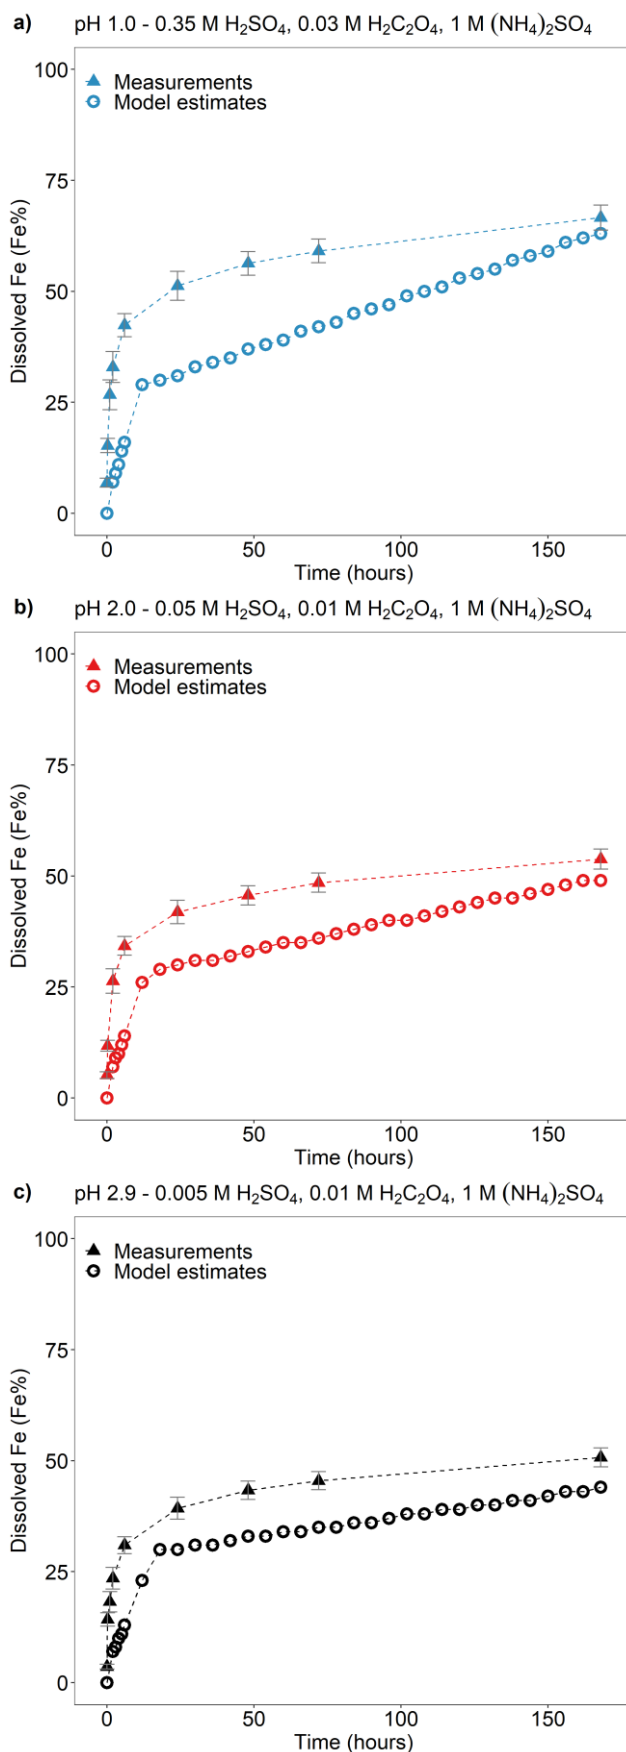

**Figure S2:** Comparison between the Fe dissolution kinetics of Krakow ash predicted using Eq. (1) and measured in  $\text{H}_2\text{SO}_4$  solutions a) at pH 1.0 with 0.03 M  $\text{H}_2\text{C}_2\text{O}_4$  and 1 M  $(\text{NH}_4)_2\text{SO}_4$ , b) at pH 2.0 with 0.01 M  $\text{H}_2\text{C}_2\text{O}_4$  and 1 M  $(\text{NH}_4)_2\text{SO}_4$ , c) at pH 2.9 with 0.01 M  $\text{H}_2\text{C}_2\text{O}_4$  and 1 M  $(\text{NH}_4)_2\text{SO}_4$ . The molar concentrations of  $\text{H}_2\text{SO}_4$ ,  $\text{H}_2\text{C}_2\text{O}_4$  and  $(\text{NH}_4)_2\text{SO}_4$  in the experiment solutions are shown. The final pH of the experiment solutions is also reported, which was calculated using the E-AIM model III for aqueous solution (Wexler and Clegg, 2002) accounting for the buffer capacity of the CFA samples (Experiment 7 at pH 1.0, Experiment 3 at pH 2.0, and Experiment 3 at pH 2.9 in Table S1).

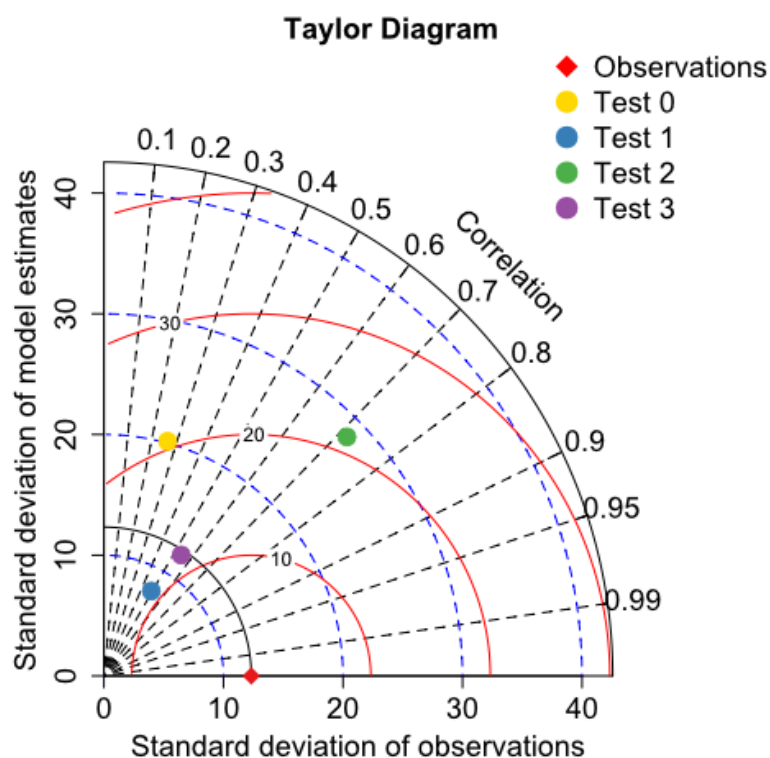

**Figure S3:** Comparison between observations and model estimates of Fe solubility in PM<sub>2.5</sub> aerosol particles over the Bay of Bengal from 27 December 2008 to 26 January 2009. Observations are from Bikkina et al. (2020). Model estimates of Test 0, Test 1, Test 2, and Test 3 were calculated along the cruise tracks using the IMPACT model. The Taylor diagram summarizes the statistics for the comparison between observations of aerosol Fe solubility and the different simulations (Test 0-3). The dashed curves in blue indicate the standard deviation values. The curves in red denote the root-mean-squared difference between the observational data and the model predictions (RMSE). The dashed lines in black represent the correlation coefficients.

80

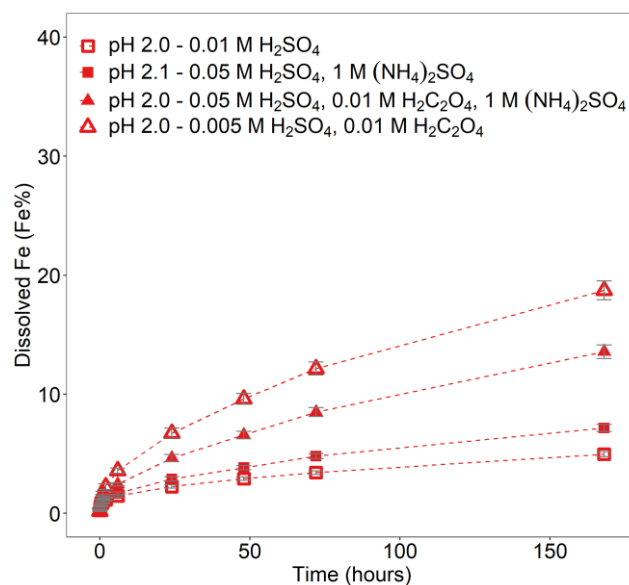

85

**Figure S4: Fe dissolution kinetics of Libyan dust end member in H<sub>2</sub>SO<sub>4</sub> solutions at around pH 2 (open rectangles), with 1 M (NH<sub>4</sub>)<sub>2</sub>SO<sub>4</sub> (filled rectangles), with 0.01 M H<sub>2</sub>C<sub>2</sub>O<sub>4</sub> (open triangles), with 0.01 M H<sub>2</sub>C<sub>2</sub>O<sub>4</sub> and 1 M (NH<sub>4</sub>)<sub>2</sub>SO<sub>4</sub> (filled triangles). The molar concentrations of H<sub>2</sub>SO<sub>4</sub>, H<sub>2</sub>C<sub>2</sub>O<sub>4</sub> and (NH<sub>4</sub>)<sub>2</sub>SO<sub>4</sub> in the experiment solutions are shown. The final pH of the experiment solutions is also reported, which was calculated using the E-AIM model III for aqueous solution (Wexler and Clegg, 2002) accounting for the buffer capacity of the CFA samples (Experiments 1-4 in Table S1). The data uncertainty was estimated using the error propagation formula.**

90

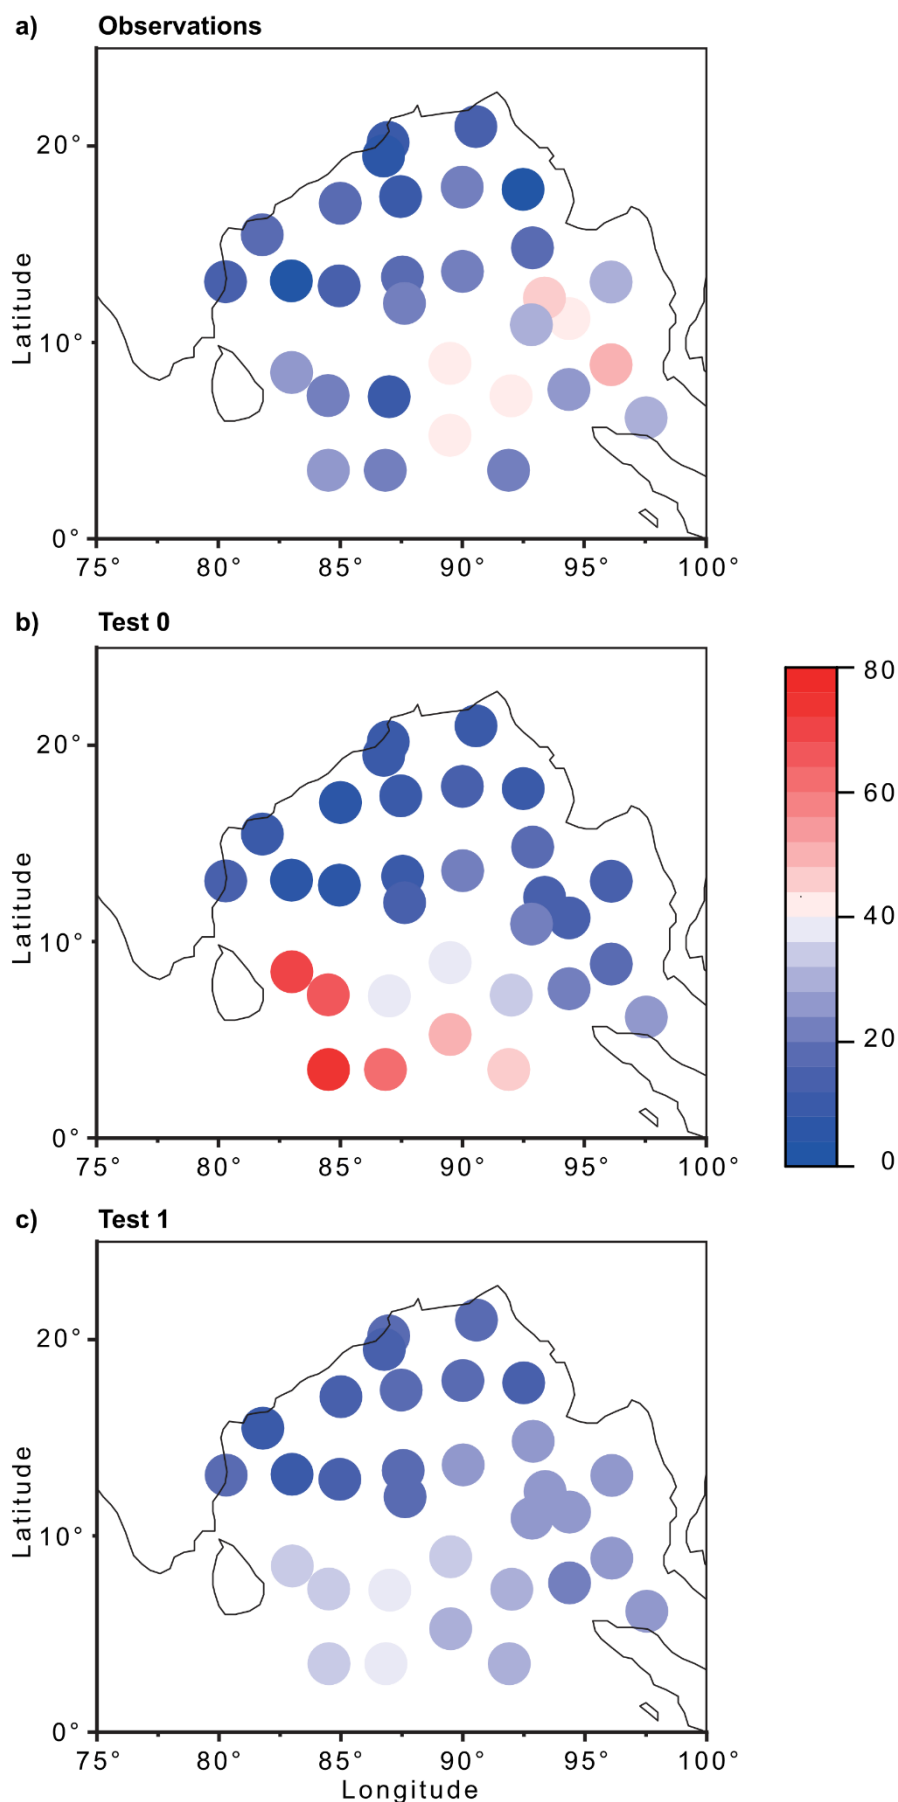

**Figure S5: Fe solubility in PM<sub>2.5</sub> aerosol particles over the Bay of Bengal from 27 December 2008 to 26 January 2009. a) Observations from Bikkina et al. (2020). b-c) Model estimates of Test 0 and Test 1 calculated along the cruise tracks using the IMPACT model. In Test 0, we ran the model without upgrades in the Fe dissolution scheme (Ito et al., 2021) and applying the proton-promoted, oxalate-promoted and photoinduced dissolution schemes for combustion aerosols in Table S6 (Ito, 2015). The proton + oxalate dissolution scheme (Table 1) was applied in Test 1 and we adopted the base mineralogy for anthropogenic Fe emissions (Rathod et al., 2020).**

## References

- 100 Bikkina, S., Kawamura, K., Sarin, M., and Tachibana, E.:  $^{13}\text{C}$  Probing of Ambient Photo-Fenton Reactions Involving Iron and Oxalic Acid: Implications for Oceanic Biogeochemistry, *ACS Earth Space Chem.*, 4, 964-976, doi: 10.1021/acsearthspacechem.0c00063, 2020.
- Ito, A.: Atmospheric Processing of Combustion Aerosols as a Source of Bioavailable Iron, *Environ. Sci. Technol. Lett.*, 2, 70-75, doi: 10.1021/acs.estlett.5b00007, 2015.
- 105 Ito, A., Lin, G. X., and Penner, J. E.: Radiative forcing by light-absorbing aerosols of pyrogenetic iron oxides, *Sci. Rep.*, 8, 7347, doi: 10.1038/s41598-018-25756-3, 2018.
- Ito, A., Adebiyi, A. A., Huang, Y., and Kok, J. F.: Less atmospheric radiative heating by dust due to the synergy of coarser size and aspherical shape, *Atmos. Chem. Phys.*, 21, 16869–16891, doi: 10.5194/acp-21-16869-2021, 2021.
- 110 Rathod, S. D., Hamilton, D. S., Mahowald, N. M., Klimont, Z., Corbett, J. J., and Bond, T. C.: A Mineralogy-Based Anthropogenic Combustion-Iron Emission Inventory, *J. Geophys. Res.-Atmos.*, 125, e2019JD032114, doi: 10.1029/2019jd032114, 2020.
- Wexler, A. S., and Clegg, S. L.: Atmospheric aerosol models for systems including the ions  $\text{H}^+$ ,  $\text{NH}_4^+$ ,  $\text{Na}^+$ ,  $\text{SO}_4^{2-}$ ,  $\text{NO}_3^-$ ,  $\text{Cl}^-$ ,  $\text{Br}^-$ , and  $\text{H}_2\text{O}$ , *J. Geophys. Res.-Atmos.*, 107, 4207, doi: 10.1029/2001JD000451, 2002.
